# Supplementary material for: Clinical Implication and the Hereditary Factors of NM23 in Hepatocellular Carcinoma Based on Bioinformatics Analysis and Genome–Wide Association Study
Source: J Oncol. 2018 Dec 18;2018:6594169. doi: 10.1155/2018/6594169 (PMC6312618; doi:10.1155/2018/6594169)
Supplement: Supplementary Materials — Supplementary Table S1. Primers of polymerase chain reaction for candidate SNPs. Supplementary Table S2. NM23 expression and ROC analysis of enrolled HCC datasets in this study. Supplementary Table S3. Candidate SNPs in HBV-related HCC patients. Supplementary Table S4. Association between genotypes of candidate SNPs with NM23 expression. Supplementary Table S5. The association between Gene expression levels and clinical outcomes of HBV-related HCC patients. Supplementary Table S6. Association between PSORS1C1 and STARD3 SNPs with clinical outcomes of HBV-related HCC patients after hepatic resection. Supplementary Figure S1. Candidate SNPs eQTL analysis in GTEx portal. Supplementary Figure S2. Stratified analysis on association of rs541820233–TC (A), rs556285588–AG (B), and rs560052000–GC (C) with outcomes in HBV-related HCC patients. The HRs are indicated for overall survival. The figure is stratified by favorable and adverse strata. [file 6594169.f1.zip]

Archive with 3 entries (3 files):
- Supplementary Figure S1_JO_2602088.eps
- Supplementary Figure S2_JO_2602089.eps
- Supplementary material-Tables_JO_2602127.docx
